# Supplementary material
Source: Springer Nature journal article supplement (https://www.springermedizin.de/resource/supplementary/12872_2013_747_MOESM2_ESM.pdf/9430796)

**Life change: reassessing past, present and future lives**

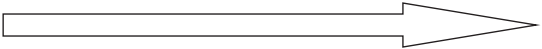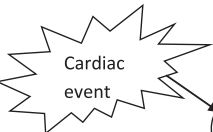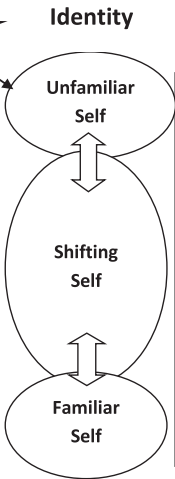

**Coping**

**Emotional Self:**  
Fear & Uncertainty,  
Disconnection &  
Denial. Grief & Loss

**Thinking Self:**  
Reprioritising,  
Living in the  
moment

**Acting Self:** Finding  
a way to get back to  
'normal'

**Finding new limits, monitoring warning signs & integrating changes**

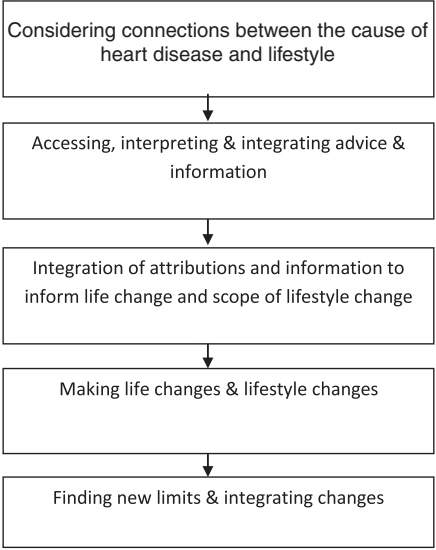

**A New Normal**

Living a life with 'health' uncertainty

Living with a changed body

Managing warning signs

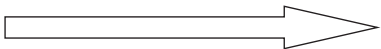

**Finding support for self**

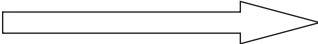

Supplement: MOESM2 [file 9430796]
